# Supplementary material for: HPV prevalence and genotype distribution in a population-based split-sample study of well-screened women using CLART HPV2 Human Papillomavirus genotype microarray system
Source: PubMed Central journal article supplement (PMC4122758; doi:10.1186/1471-2334-14-413), 2014-07-26

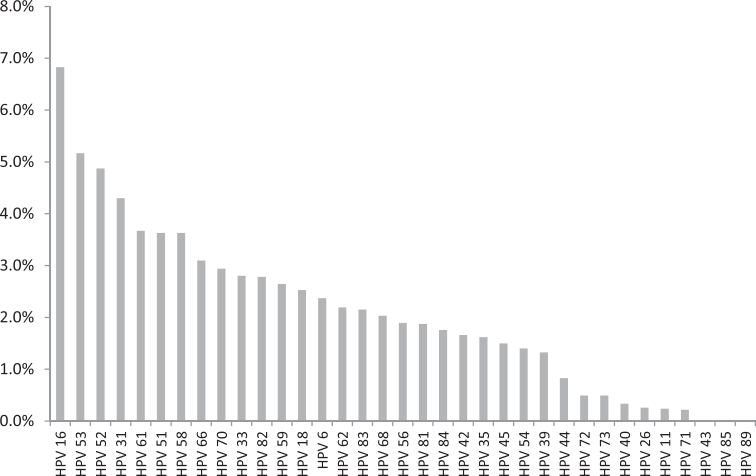

Supplement: 12879_2013_3714_MOESM1_ESM.pdf [file 12879_2013_3714_MOESM1_ESM.pdf]
